# Supplementary material for: Coverage and Equity of Childhood Vaccines in China
Source: PubMed Central journal article supplement (PMC9856225; doi:10.1001/jamanetworkopen.2022.46005), 2022-12-09
Supplement: jamanetwopen-e2246005-s002.pdf [file jamanetwopen-e2246005-s002.pdf]

## **Data Sharing Statement**

Zhang H, Lai X, Mak J, et al. Coverage and equity of childhood vaccines in China. *JAMA Netw Open*. 2022;5(12):e2246005. doi:10.1001/jamanetworkopen.2022.46005

### **Data**

**Data available:** No

### **Additional Information**

**Explanation for why data not available:** Data for childhood immunization records and socioeconomic characteristics are not sharable according to the respondents' consent agreement.
